# Supplementary material
Source: PubMed Central journal article supplement (PMC8762397)
Supplement: mmc1.pdf [file mmc1.pdf]

iScience, Volume 25

## **Supplemental information**

### **ACE2 can act as the secondary receptor in the Fc $\gamma$ R-dependent ADE of SARS-CoV-2 infection**

**Zai Wang, Tingting Deng, Yulian Zhang, Wenquan Niu, Qiangqiang Nie, Shengnan Yang, Peipei Liu, Pengfei Pei, Long Chen, Haibo Li, and Bin Cao**

Supplementary Figures

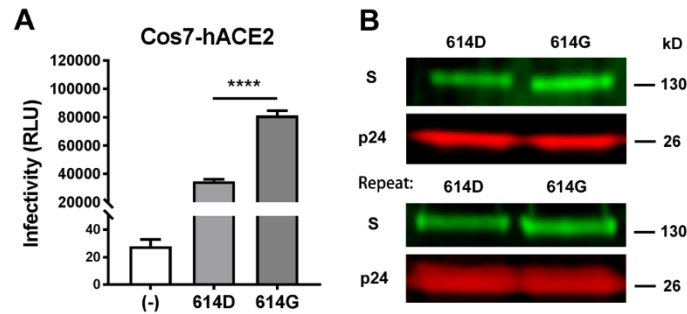

**Figure S1. Generation of 614D and 614G pseudotyped viruses, related to Figure 1. (A)** Infectivity of HIV/SARS-CoV-2 bearing S 614D (WT) or 614G on Cos7-hACE2 cells. Data were derived from three independent experiments, and are presented as mean±SD. One-way ANOVA was used to compare the difference between groups. \*\*\*\*p<0.0001. **(B)** SARS-CoV-2 S and HIV p24 proteins detected by Western blot.

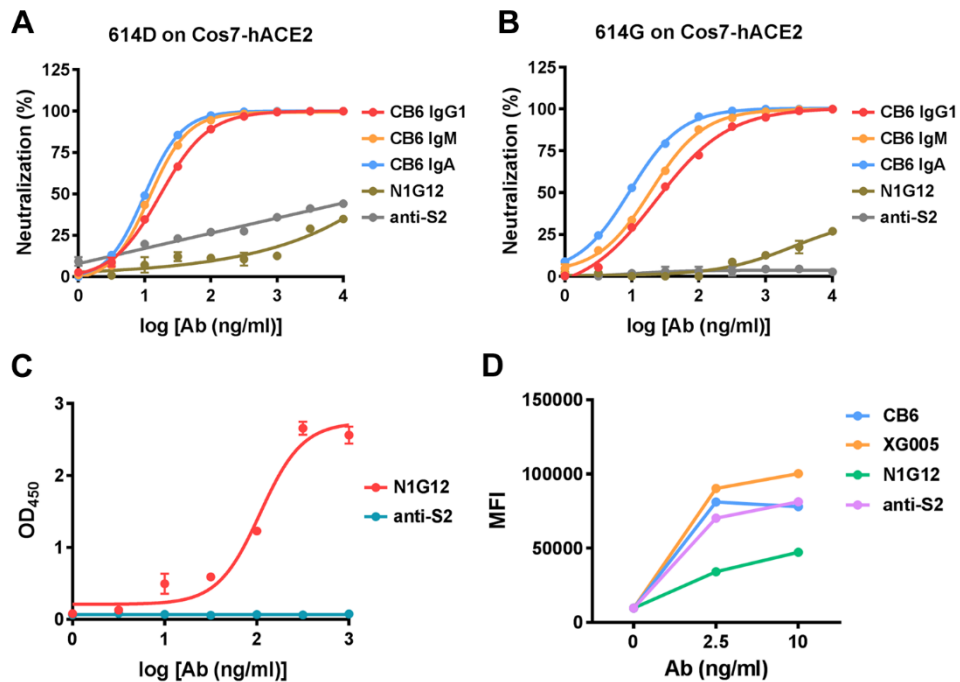

**Figure S2. Neutralization ability of SARS-CoV-2 antibodies, related to Figure 1. (A and B)** Neutralization ability of anti-S2, N1G12 and CB6 antibodies on 614D **(A)** and 614G **(B)** pseudovirus. **(C)** ELISA assay showing the binding abilities of N1G12 and anti-S2 to SARS-CoV-2 S1. Data were derived from three independent experiments, and are presented as mean±SD. **(D)** Flow cytometry assay showing the binding abilities of antibodies to S protein

expressed on 293T cells. Data were derived from assays in duplicates with mean values presented.

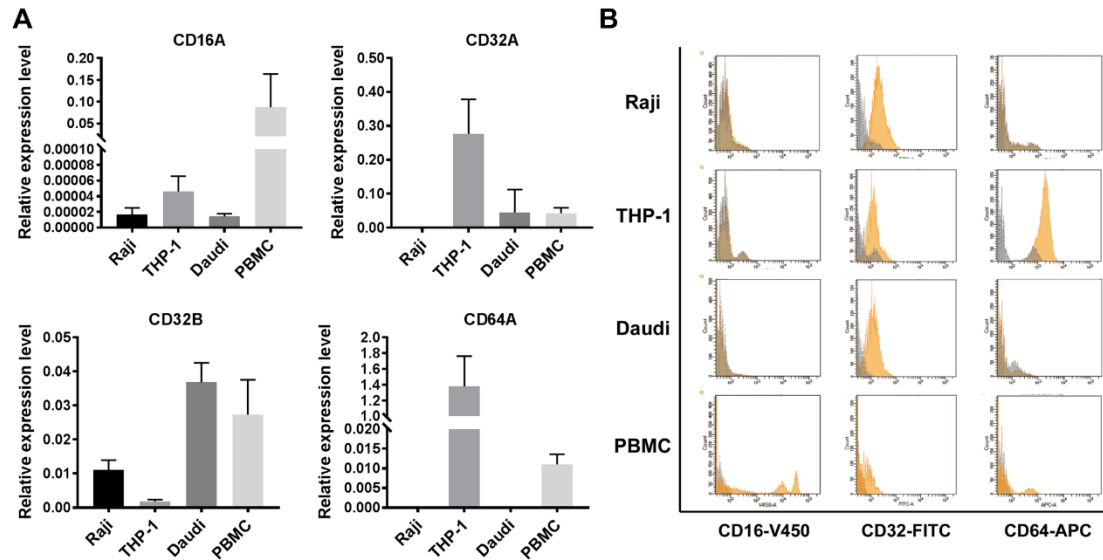

**Figure S3. Surface expression of Fc $\gamma$ R<sub>s</sub> on immune cells, related to Figure 1. (A)** Real-time RT PCR was performed to analysis the mRNA level of CD16A, CD32A, CD32B and CD64A in THP-1, Raji, Daudi immune cell lines and PBMCs. Data were derived from three independent experiments, and are presented as mean $\pm$ SD. **(B)** THP-1, Raji, Daudi and PBMCs were incubated with anti-CD16 conjugated with V450, anti-CD32 conjugated with FITC and anti-CD64 conjugated with APC, and then subjected to flow cytometry analysis. Non-targeting antibodies in IgG1 isotype conjugated with the same fluorophore were used as negative controls.

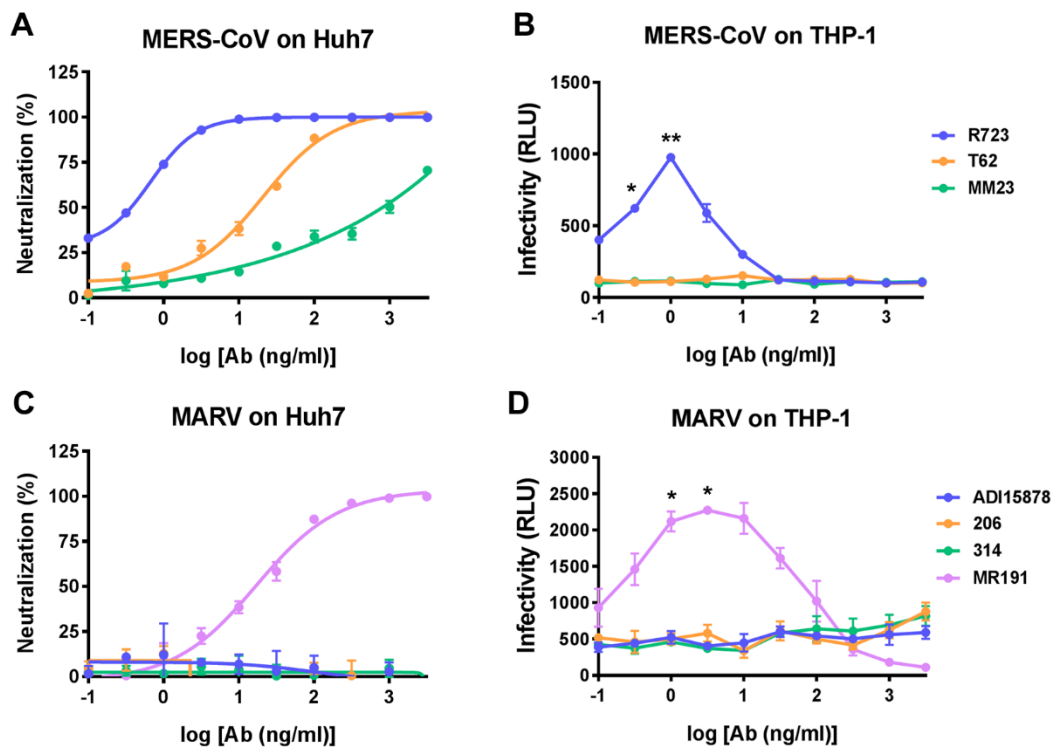

Figure S4. MERS-CoV and MARV exhibit ADE on THP-1 cells, related to Figure 1.

(A and B) Neutralization (A) and ADE (B) assays for HIV/MERS-CoV on Huh7 and THP-1 cells, respectively.

(C and D) Neutralization (C) and ADE (D) assays for HIV/MARV on Huh7 and THP-1 cells, respectively.

Data were derived from three independent experiments, and are presented as mean±SD. Repeated measurement of one-way ANOVA was used to compare the difference between the enhanced infectivity and the infectivity at basal level. \*p<0.05; \*\*p<0.01.

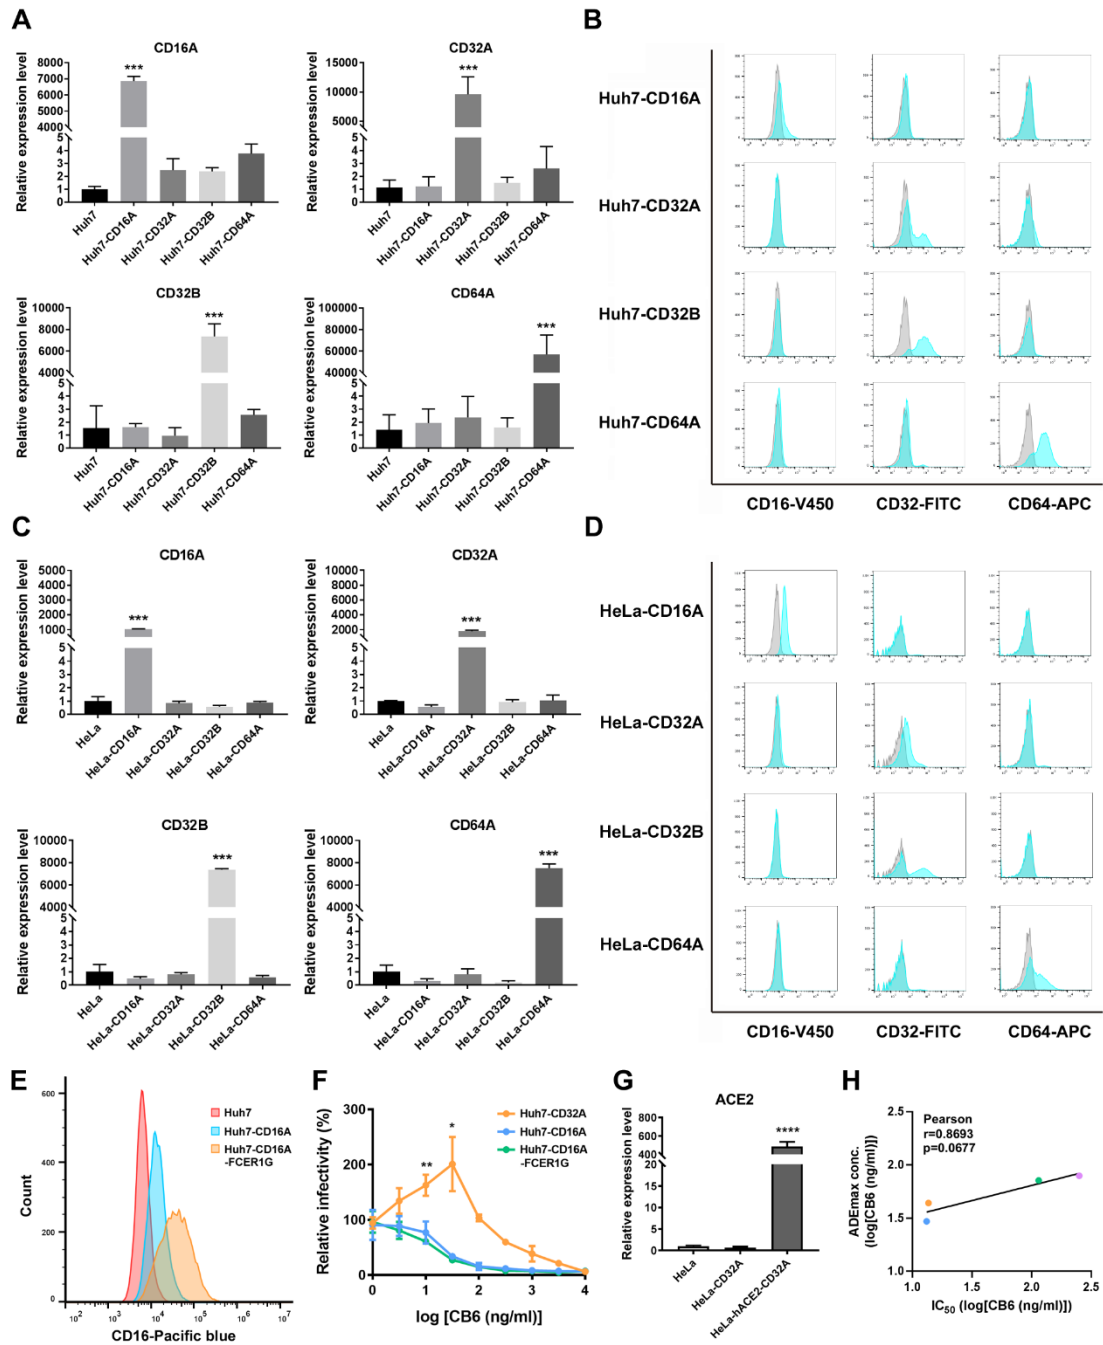

**Figure S5. Establishment of Fc $\gamma$ R-overexpressing cells, related to Figure 2. (A and C)** Real-time RT PCR was performed to analysis the mRNA level of CD16A, CD32A, CD32B and CD64A in Huh7 **(A)** or HeLa **(C)** cells expressing different Fc $\gamma$ R. Data were derived from three independent experiments, and are presented as mean $\pm$ SD. One-way ANOVA was used to compare the difference between control cell group (Huh7 or HeLa) and its derived cell group. \*\*\*p<0.001. **(B and D)** Huh7 **(B)** or HeLa **(D)** cells expressing different Fc $\gamma$ R were incubated with anti-CD16 conjugated with V450, anti-CD32 conjugated with FITC and anti-CD64

conjugated with APC, and then subjected to flow cytometry analysis. Huh7 **(B)** or HeLa **(D)** cells stained with the same antibodies were used as negative controls. \*\*\* $p < 0.001$ . **(E)** Cell surface expression of CD16A was improved with co-expression of FCER1G. Huh7, Huh7-CD16A and Huh7-CD16A-FCER1G cells were incubated with anti-CD16 conjugated with Pacific blue, and then subjected to flow cytometry analysis. **(F)** Improved cell surface expression of CD16A did not support CB6-mediated ADE. Relative infectivity of SARS-CoV-2 pseudovirus (614G) on Huh7-CD32A, Huh7-CD16A and Huh7-CD16A-FCER1G cells in the presence of different concentrations of CB6 IgG1. Data were derived from three independent experiments, and are presented as mean $\pm$ SD. Repeated measurement of one-way ANOVA was used to compare the difference between the enhanced infectivity and the infectivity at basal level. \* $p < 0.05$ . **(G)** Realtime PCR was performed to analysis the mRNA level of ACE2 in HeLa-derived cells. Data were derived from three independent experiments, and are presented as mean $\pm$ SD. One-way ANOVA was used to compare the difference between control cell group (HeLa) and its derived cell group. \*\*\*\* $p < 0.0001$ . **(H)** Correlation analysis of maximum ADE induction concentration with IC<sub>50</sub> for different variants: 614D (blue), 614G (orange), N501Y-D614G (green), E484K-N501Y-D614G (purple).

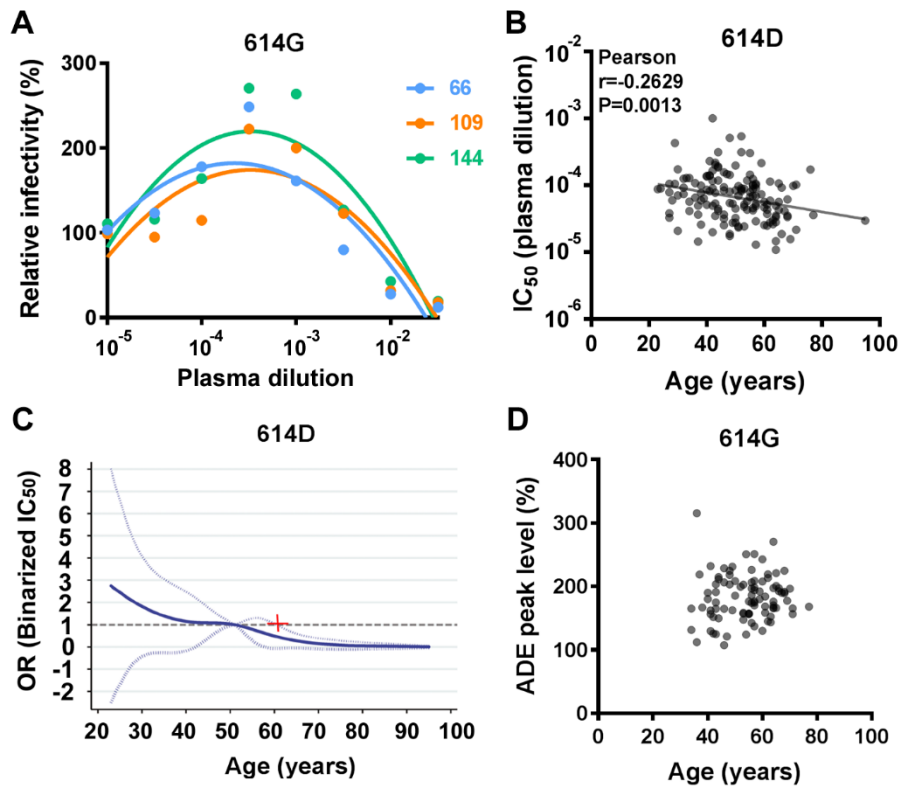

**Figure S6. Analysis of neutralization and ADE characteristics of convalescent plasma, related to Figure 4 & Figure 5. (A)** Representative data from 614G ADE assays using three convalescent plasma. a non-linear regression curve was fitted based on the relative infectivity values to derive the concentration of maximum induction of ADE. **(B)** Correlation of  $IC_{50}$  for 614D pseudovirus with patient age. A linear regression model was used for correlation analysis. **(C)** Cubic spline curve illustrating the prediction (in form of odds ratio or OR) for binarized  $IC_{50}$  of 614D variant with increasing age. The solid blue line represents the OR values, and the dotted light-blue lines represent the corresponding 95% confidence intervals. **(D)** No correlation was present between 614G ADE peak level and the patient age.

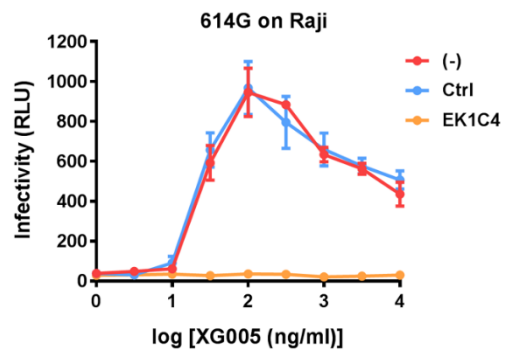

Figure S7. Membrane fusion is essential for XG005-mediated ADE on Raji cells, related to Figure 6.

Effect of EK1C4 on XG005-mediated SARS-CoV-2 (614G) ADE on Raji cells.

Data were derived from three independent experiments, and are presented as mean±SD.
